# Supplementary material for: From Abstainers to Dependent Drinkers: alcohol consumption patterns and risk factors among Portuguese university students
Source: PeerJ journal article supplement (doi:10.7717/peerj.20026), 2025-09-24
Supplement: Supplemental_Results.pdf [file Supplemental_Results.pdf]

## Results for Group Differences of the ACQ-SF-R Factor Scores

Regarding the ACQ-SF-R factor scores, significant differences between groups were also revealed for Emotionality [ $F(4, 95.821) = 38.837, p < .001, \omega^2 = .141$ ], Purposefulness [ $F(4, 95.829) = 66.319, p < .001, \omega^2 = .258$ ] and Compulsivity [ $F(4, 94.954) = 67.564, p < .001, \omega^2 = .231$ ].

*Post-hoc* comparisons for the Emotionality factor showed higher scores for Dependent Drinkers, with significant differences compared to Moderate Drinkers ( $p = .018$ ) and Abstainers ( $p = .003$ ). Similarly, Binge Drinkers had significantly higher scores compared to Moderate Drinkers ( $p < .001$ ) and Abstainers ( $p < .001$ ). Hazardous Drinkers also scored higher than Moderate Drinkers ( $p < .001$ ) and Abstainers ( $p < .001$ ), and Moderate Drinkers had higher scores than Abstainers ( $p < .001$ ).

Regarding the Purposefulness factor, the highest scores were found in Dependent Drinkers, with significant differences compared to Moderate Drinkers ( $p = .016$ ) and Abstainers ( $p = .001$ ). Binge Drinkers had higher scores compared to Hazardous Drinkers ( $p < .001$ ), Moderate Drinkers ( $p < .001$ ) and Abstainers ( $p < .001$ ). Hazardous Drinkers scored higher than Moderate Drinkers ( $p < .001$ ) and Abstainers ( $p < .001$ ); and Moderate Drinkers had higher scores than Abstainers ( $p < .001$ ).

Lastly, for the Compulsivity factor, the Dependent Drinkers group displayed the highest scores, with significant differences compared to Hazardous Drinkers ( $p = .048$ ), Moderate Drinkers ( $p = .008$ ), and Abstainers ( $p = .003$ ). Binge Drinkers showed higher scores than Hazardous Drinkers ( $p = .016$ ), Moderate Drinkers ( $p < .001$ ), and Abstainers ( $p < .001$ ). Hazardous Drinkers scored higher than Moderate Drinkers ( $p < .001$ ) and Abstainers ( $p < .001$ ); and Moderate Drinkers had higher scores than Abstainers ( $p < .001$ ).
